# Supplementary material for: Race and Ethnicity Representation in Phase 2/3 Oncology Clinical Trial Publications: A Systematic Review
Source: PubMed Central journal article supplement (PMC11161837; doi:10.1001/jamahealthforum.2024.1388), 2024-06-07
Supplement: jamahealthforum-e241388-s002.pdf [file jamahealthforum-e241388-s002.pdf]

## Data Sharing Statement

Taparra. Race and Ethnicity Representation in Phase 2/3 Oncology Clinical Trial Publications. *JAMA Health Forum*. Published June 07, 2024. doi:10.1001/jamahealthforum.2024.1388

### Data

**Data available:** No

### Additional Information

**Explanation for why data not available:** Papers included in the study are publicly available.
